# Supplementary material for: Serotype Distribution of Remaining Pneumococcal Meningitis in the Mature PCV10/13 Period: Findings from the PSERENADE Project
Source: MDPI journal article supplement (doi:10.3390/microorganisms9040738), 2021-04-01
Supplement: s1 [file s1]

# Serotype Distribution of Remaining Pneumococcal Meningitis in the Mature PCV10/13 Period: Findings from the PSERENADE Project

## Table of Contents

|                                                                                                                                                                                                      |    |
|------------------------------------------------------------------------------------------------------------------------------------------------------------------------------------------------------|----|
| <b>Table S1.</b> Percentage of pneumococcal meningitis in the mature PCV10/13 period due to serotypes included in current and upcoming PCV products .....                                            | 2  |
| <b>Table S2.</b> Serotype specific distribution of CSF+ pneumococcal meningitis in the mature PCV10/13 period, by age group .....                                                                    | 3  |
| <b>Figure S1.</b> Distribution of CSF+ meningitis cases and non-CSF+ clinically-defined meningitis cases in the mature PCV10/13 period by age group .....                                            | 6  |
| <b>Figure S2.</b> Serotype specific distribution of pneumococcal meningitis in the mature PCV10/13 period, including all meningitis cases (CSF+ and non-CSF+ clinically defined meningitis cases). 7 | 7  |
| <b>Figure S3.</b> Modeled distribution for the percentage of CSF+ pneumococcal meningitis due to serotypes included in current and upcoming products, in both PCV10 and PCV13 using sites ... 7      | 7  |
| <b>Table S3.</b> Modeled percentage of CSF+ pneumococcal meningitis due to serotypes included in current and upcoming pneumococcal vaccine products, by age group .....                              | 8  |
| <b>Figure S4.</b> Serotype-specific distribution of CSF+ pneumococcal meningitis in the mature PCV10/13 period, comparing Brazil to the other PCV10-using sites.....                                 | 9  |
| <b>Figure S5.</b> Distribution of top 10 ranking serotypes causing CSF+ pneumococcal meningitis in each PCV13-using site .....                                                                       | 10 |
| <b>Table S4.</b> Characteristics of sites contributing pneumococcal meningitis cases to analyses.....                                                                                                | 11 |

**Table S1.** Percentage of pneumococcal meningitis in the mature PCV10/13 period due to serotypes included in current and upcoming PCV products

**A. CSF+ cases only**

| Age category | Serotype Category | PCV13-using sites          | PCV10-using sites             |                                    |
|--------------|-------------------|----------------------------|-------------------------------|------------------------------------|
|              |                   | (N = 4,444)<br>Mean % (CI) | Brazil (N=917)<br>Mean % (CI) | Other sites (N=224)<br>Mean % (CI) |
| < 5 years    | PCV10             | 7.4 (4.9, 9.5)             | 4.8 (2.3, 8.6)                | 4.9 (0.6, 16.5)                    |
|              | PCV13             | 14.1 (10.4, 16.2)          | 40.0 (33.3, 47.0)             | 29.3 (16.1, 45.5)                  |
|              | PCV15             | 20.9 (19.2, 24.3)          | 41.4 (34.7, 48.4)             | 40.5 (24.8, 57.9)                  |
|              | PCV20             | 56.1 (50.5, 60.1)          | 61.4 (54.5, 68.1)             | 53.9 (37.2, 69.9)                  |
|              | PCV24             | 60.4 (54.2, 65.2)          | 63.8 (56.9, 70.3)             | 56.4 (39.6, 72.2)                  |
|              | PPV23             | 59.8 (54.2, 64.6)          | 61.0 (54.0, 67.6)             | 56.4 (39.6, 72.2)                  |
| ≥ 5 years    | PCV10             | 9.8 (7.5, 11.8)            | 7.6 (5.8, 9.9)                | 14.9 (10.1, 21.0)                  |
|              | PCV13             | 25.8 (23.6, 27.6)          | 38.5 (34.9, 42.2)             | 37.0 (30.0, 44.5)                  |
|              | PCV15             | 31.8 (29.3, 34.1)          | 40.6 (37.0, 44.3)             | 39.1 (31.4, 47.2)                  |
|              | PCV20             | 57.0 (54.3, 61.9)          | 53.3 (49.6, 57.1)             | 63.5 (55.4, 71.0)                  |
|              | PCV24             | 63.4 (60.5, 69.2)          | 57.9 (54.1, 61.5)             | 69.2 (61.4, 76.4)                  |
|              | PPV23             | 62.8 (60.1, 69.0)          | 56.3 (52.6, 60.0)             | 68.0 (60.0, 75.2)                  |

**B. All meningitis cases (CSF+ and non-CSF+ clinically defined meningitis)**

| Age category | Serotype Category | PCV13-using sites          | PCV10-using sites               |                                    |
|--------------|-------------------|----------------------------|---------------------------------|------------------------------------|
|              |                   | (N = 5,353)<br>Mean % (CI) | Brazil (N=1,020)<br>Mean % (CI) | Other sites (N=240)<br>Mean % (CI) |
| < 5 years    | PCV10             | 7.1 (5.9, 10.6)            | 5.1 (2.7, 8.7)                  | 4.9 (0.6, 16.5)                    |
|              | PCV13             | 14.8 (10.7, 17.5)          | 40.3 (33.9, 46.8)               | 29.3 (16.1, 45.5)                  |
|              | PCV15             | 22.6 (19.6, 24.0)          | 41.5 (35.2, 48.1)               | 40.5 (24.8, 57.9)                  |
|              | PCV20             | 56.6 (52.3, 63.1)          | 61.0 (54.5, 67.3)               | 53.9 (37.2, 69.9)                  |
|              | PCV24             | 61.4 (56.2, 66.1)          | 63.6 (57.1, 69.7)               | 56.4 (39.6, 72.2)                  |
|              | PPV23             | 60.8 (55.3, 65.5)          | 60.6 (54.1, 66.9)               | 56.4 (39.6, 72.2)                  |
| ≥ 5 years    | PCV10             | 9.2 (7.7, 10.5)            | 7.5 (5.8, 9.6)                  | 13.7 (9.2, 19.3)                   |
|              | PCV13             | 25.2 (22.8, 26.5)          | 37.8 (34.4, 41.3)               | 34.0 (27.4, 41.1)                  |
|              | PCV15             | 30.8 (28.2, 32.1)          | 39.8 (36.4, 43.3)               | 38.4 (31.1, 46.1)                  |
|              | PCV20             | 57.2 (53.3, 59.5)          | 53.1 (49.5, 56.6)               | 64.0 (56.3, 71.1)                  |
|              | PCV24             | 63.4 (60.0, 66.2)          | 57.8 (54.2, 61.3)               | 69.8 (62.3, 76.5)                  |
|              | PPV23             | 62.7 (59.0, 65.7)          | 56.1 (52.6, 59.6)               | 68.6 (61.1, 75.5)                  |

Serotypes included in each product: PCV7 (4, 6B, 9V, 14, 18C, 19F, 23F), PCV10 (PCV7 + 1, 5, 7F), PCV13 (PCV10 + 3, 6A, 19A), PCV15 (PCV13 + 22F, 33F), PCV20 (PCV15 + 8, 10A, 11A, 12F, 15BC), PCV24 (PCV20 + 2, 9N, 17F, 20), PPV23 (PCV24 - 6A). PCV13 is Pfizer's Prevnar13/Prevenar13; PCV10 is GSK's Synflorix.

**Table S2.** Serotype specific distribution of CSF+ pneumococcal meningitis in the mature PCV10/13 period, by age group

## A. Children &lt; 5 years of age

| Serotype | PCV13-using sites        | PCV10-using sites               |                               |                                   |
|----------|--------------------------|---------------------------------|-------------------------------|-----------------------------------|
|          | (N=1,173)<br>Mean % (CI) | Combined (N=243)<br>Mean % (CI) | Brazil (N=210)<br>Mean % (CI) | Other sites (N=32)<br>Mean % (CI) |
| 15BC     | 11.5 (8.0, 15.1)         | 6.6 (3.8, 10.5)                 | 7.1 (4.0, 11.5)               | 3.1 (0.1, 16.2)                   |
| 10A      | 7.1 (4.1, 10.2)          | 4.5 (2.3, 8.0)                  | 4.8 (2.3, 8.6)                | 3.1 (0.1, 16.2)                   |
| 8        | 7.1 (2.5, 11.8)          | 4.1 (2.0, 7.5)                  | 3.8 (1.7, 7.4)                | 6.2 (0.8, 20.8)                   |
| 24F      | 5.9 (1.1, 10.6)          | 5.4 (2.9, 9.0)                  | 5.2 (2.6, 9.2)                | 6.2 (0.8, 20.8)                   |
| 22F      | 4.9 (3.0, 6.7)           | 0.8 (0.1, 3.0)                  | 0.9 (0.1, 3.4)                | --                                |
| 23B      | 4.8 (3.0, 6.5)           | 4.1 (2.0, 7.5)                  | 3.8 (1.7, 7.4)                | 6.2 (0.8, 20.8)                   |
| 12F      | 4.6 (2.2, 7.0)           | 2.1 (0.7, 4.8)                  | 1.4 (0.3, 4.1)                | 6.2 (0.8, 20.8)                   |
| 3        | 4.0 (2.1, 5.8)           | 7.4 (4.5, 11.5)                 | 8.1 (4.8, 12.6)               | 3.1 (0.1, 16.2)                   |
| 33F      | 3.9 (1.8, 6.0)           | 2.1 (0.7, 4.8)                  | 0.5 (0.0, 2.6)                | 12.5 (3.5, 29.0)                  |
| 15A      | 3.8 (2.2, 5.5)           | 1.2 (0.3, 3.6)                  | 0.9 (0.1, 3.4)                | 3.1 (0.1, 16.2)                   |
| 19F      | 3.6 (1.6, 5.5)           | --                              | --                            | --                                |
| 35B      | 3.1 (1.6, 4.5)           | 2.5 (0.9, 5.3)                  | 2.9 (1.1, 6.1)                | --                                |
| 27       | 2.6 (0.8, 4.4)           | --                              | --                            | --                                |
| 19A      | 2.5 (1.5, 3.6)           | 24.4 (19.1, 30.3)               | 24.3 (18.6, 30.7)             | 25.0 (11.5, 43.4)                 |
| 16F      | 2.3 (0.8, 3.8)           | 2.9 (1.2, 5.9)                  | 3.3 (1.4, 6.8)                | --                                |
| 9N       | 1.9 (0.7, 3.1)           | 0.8 (0.1, 3.0)                  | 0.9 (0.1, 3.4)                | --                                |
| 38       | 1.9 (0.7, 3.0)           | 0.4 (0.0, 2.3)                  | --                            | 3.1 (0.1, 16.2)                   |
| 21       | 1.8 (0.8, 2.8)           | 0.4 (0.0, 2.3)                  | --                            | 3.1 (0.1, 16.2)                   |
| 35F      | 1.7 (0.5, 2.8)           | 0.4 (0.0, 2.3)                  | 0.5 (0.0, 2.6)                | --                                |
| 23A      | 1.4 (0.5, 2.4)           | 2.5 (0.9, 5.3)                  | 2.9 (1.1, 6.1)                | --                                |
| 17F      | 1.3 (0.6, 2.1)           | 0.8 (0.1, 3.0)                  | 0.9 (0.1, 3.4)                | --                                |
| 11A      | 1.2 (0.2, 2.2)           | 2.5 (0.9, 5.3)                  | 2.9 (1.1, 6.1)                | --                                |
| 20       | 1.2 (1.0, 1.5)           | 0.4 (0.0, 2.3)                  | 0.5 (0.0, 2.6)                | --                                |
| 6C       | 1.0 (0.2, 1.8)           | 10.3 (6.8, 14.9)                | 10.0 (6.3, 14.9)              | 12.5 (3.5, 29.0)                  |
| 34       | 0.7 (0.5, 1.0)           | 0.4 (0.0, 2.3)                  | 0.5 (0.0, 2.6)                | --                                |
| 13       | 0.6 (0.1, 1.2)           | 0.8 (0.1, 3.0)                  | 0.9 (0.1, 3.4)                | --                                |
| 14       | 0.6 (0.0, 1.3)           | --                              | --                            | --                                |
| 1        | 0.6 (0.4, 0.8)           | --                              | --                            | --                                |
| 6A       | --                       | 2.5 (0.9, 5.3)                  | 2.9 (1.1, 6.1)                | --                                |
| 25A      | --                       | 2.1 (0.7, 4.8)                  | 2.4 (0.8, 5.5)                | --                                |
| 7F       | --                       | 2.1 (0.7, 4.8)                  | 2.4 (0.8, 5.5)                | --                                |
| 23F      | --                       | 0.8 (0.1, 3.0)                  | 0.9 (0.1, 3.4)                | --                                |
| 28A      | --                       | 0.8 (0.1, 3.0)                  | 0.9 (0.1, 3.4)                | --                                |
| 15F      | --                       | 0.4 (0.0, 2.3)                  | 0.5 (0.0, 2.6)                | --                                |
| 18B      | --                       | 0.4 (0.0, 2.3)                  | 0.5 (0.0, 2.6)                | --                                |
| 18C      | --                       | 0.4 (0.0, 2.3)                  | 0.5 (0.0, 2.6)                | --                                |
| 29       | --                       | 0.4 (0.0, 2.3)                  | 0.5 (0.0, 2.6)                | --                                |
| 6B       | --                       | 0.4 (0.0, 2.3)                  | 0.5 (0.0, 2.6)                | --                                |
| 9V       | --                       | 0.4 (0.0, 2.3)                  | 0.5 (0.0, 2.6)                | --                                |
| 36       | --                       | 0.4 (0.0, 2.3)                  | 0.5 (0.0, 2.6)                | --                                |
| 10B      | --                       | 0.4 (0.0, 2.3)                  | --                            | 3.1 (0.1, 16.2)                   |
| 31       | --                       | 0.4 (0.0, 2.3)                  | --                            | 3.1 (0.1, 16.2)                   |

B. Persons  $\geq 5$  years of age.

| Serotype | PCV13-using sites        | PCV10-using sites               |                               |                                    |
|----------|--------------------------|---------------------------------|-------------------------------|------------------------------------|
|          | (N=3,271)<br>Mean % (CI) | Combined (N=860)<br>Mean % (CI) | Brazil (N=706)<br>Mean % (CI) | Other sites (N=154)<br>Mean % (CI) |
| 3        | 13.1 (8.8, 17.4)         | 13.9 (11.7, 16.4)               | 14.9 (12.3, 17.7)             | 9.7 (5.5, 15.6)                    |
| 8        | 8.0 (4.3, 11.6)          | 2.9 (1.9, 4.3)                  | 2.3 (1.3, 3.6)                | 5.8 (2.7, 10.8)                    |
| 12F      | 6.3 (3.6, 8.9)           | 4.6 (3.3, 6.3)                  | 3.5 (2.3, 5.2)                | 9.7 (5.5, 15.6)                    |
| 23B      | 5.6 (3.7, 7.6)           | 5.3 (3.9, 7.1)                  | 5.0 (3.5, 6.8)                | 7.1 (3.6, 12.4)                    |
| 23A      | 4.8 (2.7, 6.9)           | 6.3 (4.8, 8.1)                  | 7.1 (5.3, 9.2)                | 2.6 (0.7, 6.5)                     |
| 22F      | 4.8 (3.4, 6.1)           | 2.3 (1.4, 3.6)                  | 1.8 (1.0, 3.1)                | 4.5 (1.8, 9.1)                     |
| 10A      | 4.4 (3.4, 5.5)           | 2.2 (1.3, 3.4)                  | 1.7 (0.9, 3.0)                | 4.5 (1.8, 9.1)                     |
| 9N       | 4.2 (2.8, 5.5)           | 2.4 (1.5, 3.7)                  | 2.0 (1.1, 3.3)                | 4.5 (1.8, 9.1)                     |
| 19F      | 4.0 (2.2, 5.9)           | 1.5 (0.8, 2.6)                  | 1.1 (0.5, 2.2)                | 3.2 (1.1, 7.4)                     |
| 15BC     | 3.9 (2.9, 4.9)           | 2.7 (1.7, 4.0)                  | 2.7 (1.6, 4.2)                | 2.6 (0.7, 6.5)                     |
| 15A      | 3.8 (2.1, 5.4)           | 3.1 (2.1, 4.5)                  | 3.7 (2.4, 5.3)                | 0.6 (0.0, 3.6)                     |
| 19A      | 3.1 (1.9, 4.3)           | 13.3 (11.1, 15.7)               | 14.4 (11.9, 17.3)             | 7.8 (4.1, 13.2)                    |
| 35F      | 2.9 (1.6, 4.2)           | 0.8 (0.3, 1.7)                  | 0.8 (0.3, 1.8)                | 0.6 (0.0, 3.6)                     |
| 11A      | 2.8 (1.5, 4.0)           | 2.4 (1.5, 3.7)                  | 2.5 (1.5, 4.0)                | 1.9 (0.4, 5.6)                     |
| 16F      | 2.4 (1.1, 3.8)           | 1.9 (1.1, 3.0)                  | 1.8 (1.0, 3.1)                | 1.9 (0.4, 5.6)                     |
| 6C       | 2.2 (1.2, 3.3)           | 10.1 (8.2, 12.3)                | 10.1 (7.9, 12.5)              | 10.4 (6.1, 16.3)                   |
| 24F      | 1.9 (0.7, 3.1)           | 1.5 (0.8, 2.6)                  | 1.6 (0.8, 2.8)                | 1.3 (0.2, 4.6)                     |
| 35B      | 1.7 (0.6, 2.9)           | 2.0 (1.2, 3.1)                  | 2.0 (1.1, 3.3)                | 1.9 (0.4, 5.6)                     |
| 33F      | 1.6 (0.8, 2.5)           | 0.5 (0.1, 1.2)                  | 0.3 (0.0, 1.0)                | 1.3 (0.2, 4.6)                     |
| 31       | 1.3 (0.6, 2.0)           | 0.1 (0.0, 0.6)                  | --                            | 0.6 (0.0, 3.6)                     |
| 17F      | 1.2 (0.7, 1.8)           | 0.9 (0.4, 1.8)                  | 1.0 (0.4, 2.0)                | 0.6 (0.0, 3.6)                     |
| 20       | 1.1 (0.9, 1.3)           | 1.4 (0.7, 2.4)                  | 1.6 (0.8, 2.8)                | 0.6 (0.0, 3.6)                     |
| 23F      | 1.0 (0.4, 1.6)           | 1.2 (0.6, 2.1)                  | 1.3 (0.6, 2.4)                | 0.6 (0.0, 3.6)                     |
| 7C       | 1.0 (0.2, 1.7)           | 0.7 (0.3, 1.5)                  | 0.8 (0.3, 1.8)                | --                                 |
| 14       | 0.8 (0.4, 1.2)           | 1.3 (0.6, 2.3)                  | 1.0 (0.4, 2.0)                | 2.6 (0.7, 6.5)                     |
| 7F       | 0.8 (0.4, 1.2)           | 0.8 (0.3, 1.7)                  | 0.6 (0.1, 1.4)                | 1.9 (0.4, 5.6)                     |
| 13       | 0.6 (0.4, 0.7)           | 1.7 (1.0, 2.9)                  | 2.0 (1.1, 3.3)                | 0.6 (0.0, 3.6)                     |
| 1        | 0.5 (0.4, 0.6)           | 0.2 (0.0, 0.8)                  | 0.1 (0.0, 0.8)                | 0.6 (0.0, 3.6)                     |
| 4        | --                       | 2.1 (1.2, 3.3)                  | 2.0 (1.1, 3.3)                | 2.6 (0.7, 6.5)                     |
| 34       | --                       | 1.5 (0.8, 2.6)                  | 1.8 (1.0, 3.1)                | --                                 |
| 6A       | --                       | 1.5 (0.8, 2.6)                  | 1.6 (0.8, 2.8)                | 1.3 (0.2, 4.6)                     |
| 25A      | --                       | 1.2 (0.6, 2.1)                  | 1.4 (0.7, 2.6)                | --                                 |
| 18C      | --                       | 1.2 (0.6, 2.1)                  | 1.1 (0.5, 2.2)                | 1.3 (0.2, 4.6)                     |
| 28A      | --                       | 0.8 (0.3, 1.7)                  | 0.8 (0.3, 1.8)                | 0.6 (0.0, 3.6)                     |
| 18A      | --                       | 0.7 (0.3, 1.5)                  | 0.8 (0.3, 1.8)                | --                                 |
| 21       | --                       | 0.3 (0.1, 1.0)                  | 0.3 (0.0, 1.0)                | 0.6 (0.0, 3.6)                     |
| 9V       | --                       | 0.3 (0.1, 1.0)                  | 0.3 (0.0, 1.0)                | 0.6 (0.0, 3.6)                     |
| 11B      | --                       | 0.2 (0.0, 0.8)                  | 0.3 (0.0, 1.0)                | --                                 |
| 15F      | --                       | 0.2 (0.0, 0.8)                  | 0.3 (0.0, 1.0)                | --                                 |
| 29       | --                       | 0.2 (0.0, 0.8)                  | 0.3 (0.0, 1.0)                | --                                 |
| 35C      | --                       | 0.2 (0.0, 0.8)                  | 0.3 (0.0, 1.0)                | --                                 |
| 6B       | --                       | 0.2 (0.0, 0.8)                  | 0.1 (0.0, 0.8)                | 0.6 (0.0, 3.6)                     |
| 18B      | --                       | 0.1 (0.0, 0.6)                  | 0.1 (0.0, 0.8)                | --                                 |
| 19C      | --                       | 0.1 (0.0, 0.6)                  | 0.1 (0.0, 0.8)                | --                                 |
| 24A      | --                       | 0.1 (0.0, 0.6)                  | 0.1 (0.0, 0.8)                | --                                 |
| 36       | --                       | 0.1 (0.0, 0.6)                  | 0.1 (0.0, 0.8)                | --                                 |
| 19B      | --                       | 0.1 (0.0, 0.6)                  | 0.1 (0.0, 0.8)                | --                                 |
| 6D       | --                       | 0.1 (0.0, 0.6)                  | 0.1 (0.0, 0.8)                | --                                 |

|     |    |                |    |                |
|-----|----|----------------|----|----------------|
| 10F | -- | 0.1 (0.0, 0.6) | -- | 0.6 (0.0, 3.6) |
| 25F | -- | 0.1 (0.0, 0.6) | -- | 0.6 (0.0, 3.6) |

Serotypes are ordered by percentage in PCV13-using sites (modeled output) then by percentage in PCV10-using sites (pooled output). Values shown here correspond to Figure 4, with the added distribution for Brazil and other PCV10-using sites shown separately. For PCV13-using sites, empty values correspond to serotypes that were not modeled because of their low ranking in a pooled distribution. For PCV10-using sites, empty values correspond to serotypes that had zero cases. PCV13 is Pfizer's Prevnar13/Prevenar13; PCV10 is GSK's Synflorix.

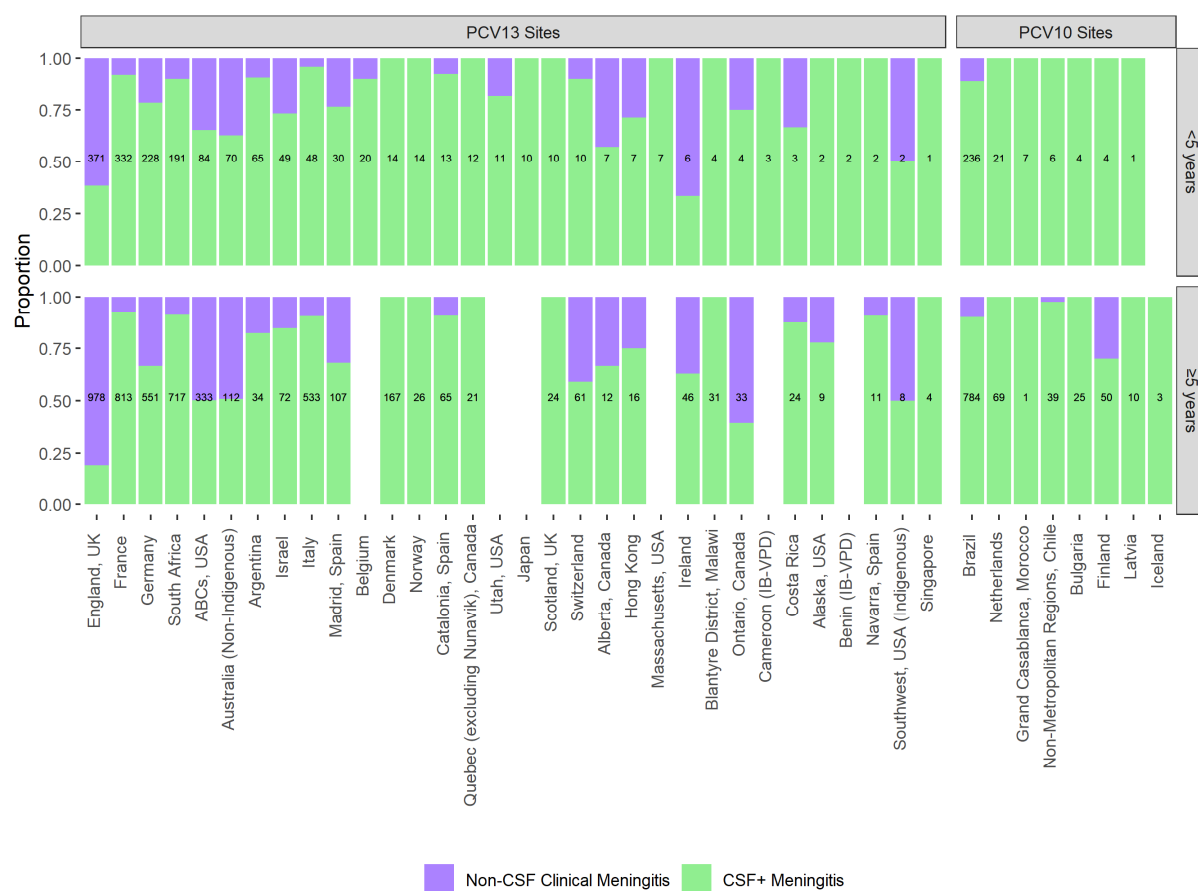

**Figure S1.** Distribution of CSF+ meningitis cases and non-CSF+ clinically-defined meningitis cases in the mature PCV10/13 period by age group. Sites are ordered by decreasing number of cases within PCV product used/ age group stratum (number in bar). PCV13 is Pfizer's Prevnar13/Prevenar13; PCV10 is GSK's Synflorix.

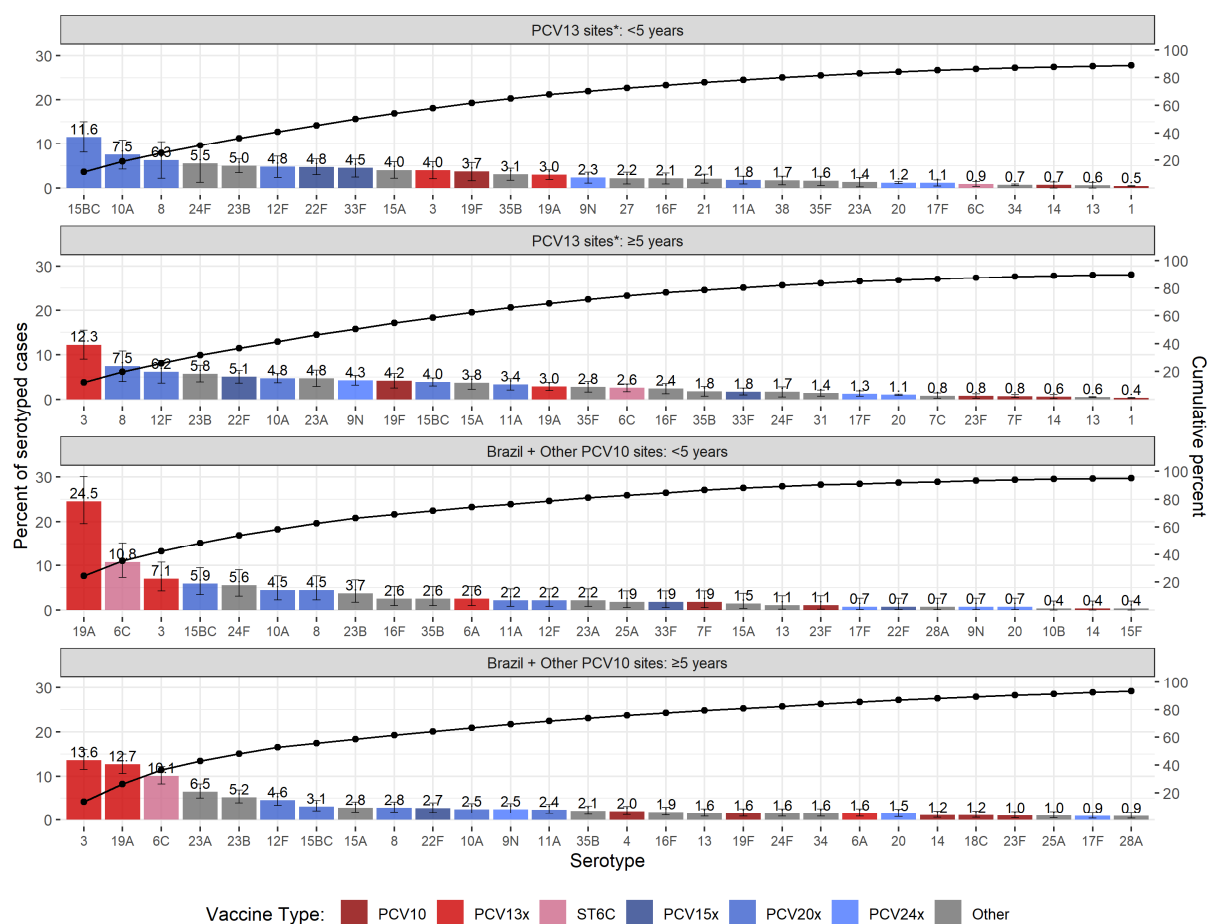

**Figure S2.** Serotype specific distribution of pneumococcal meningitis in the mature PCV10/13 period, including all meningitis cases (CSF+ and non-CSF+ clinically defined meningitis cases). Serotypes are colored by the lowest valency PCV product they are included in. The “x” in the PCV legend represents the additional serotypes included in that product relative to the next lower product (i.e., PCV13x includes serotypes 3, 6A, and 19A). PCV13 is Pfizer’s Prevnar13/Prevenar13; PCV10 is GSK’s Synflorix. Serotype 6C is colored separately because although it is not included in any product it covered through cross-protection with 6A [1]. Morocco and Bulgaria were not included in the PCV10 distribution due to serotyping limitations. \*Serotype distribution for PCV13 sites is modeled output for the top 25 serotypes based on a pooled ranking plus serotype 1. Serotype distribution for PCV10 sites is from pooling cases across sites.

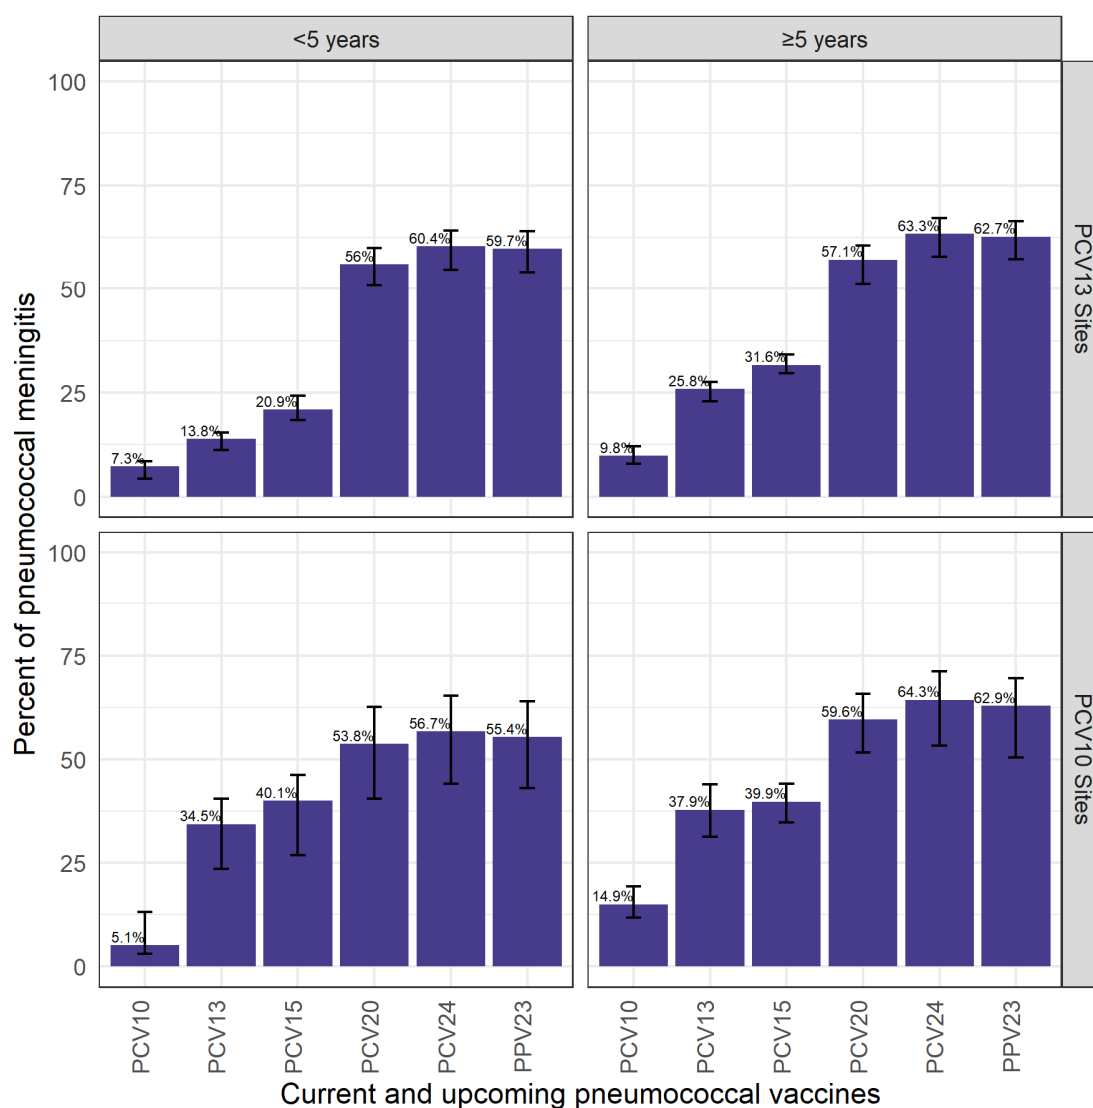

**Figure S3.** Modeled distribution for the percentage of CSF+ pneumococcal meningitis due to serotypes included in current and upcoming products, in both PCV10 and PCV13 using sites. The model includes all sites regardless of PCV product in use and uses a covariate for product to produce PCV-stratified results. Separate models were run by age group. The modeled output accounts for heterogeneity between the sites and uncertainty from low case counts (conveyed by width of confidence intervals). Results for PCV10-using sites should not be interpreted as representative of all PCV10-using sites globally given the limited data. Serotypes included in each product: PCV7 (4, 6B, 9V, 14, 18C, 19F, 23F), PCV10 (PCV7 + 1, 5, 7F), PCV13 (PCV10 + 3, 6A, 19A), PCV15 (PCV13 + 22F, 33F), PCV20 (PCV15 + 8, 10A, 11A, 12F, 15BC), PCV24 (PCV20 + 2, 9N, 17F, 20), PPV23 (PCV24 - 6A). PCV13 is Pfizer's Prevnar13/Prevenar13; PCV10 is GSK's Synflorix.



**Table S3.** Modeled<sup>1</sup> percentage of CSF+ pneumococcal meningitis due to serotypes included in current and upcoming pneumococcal vaccine products, by age group.

| PCV Product in use | Serotype Category <sup>2</sup> | $\geq 5$ years    | $\geq 50$ years   | $\geq 65$ years   |
|--------------------|--------------------------------|-------------------|-------------------|-------------------|
|                    |                                | Mean % (CI)       | Mean % (CI)       | Mean % (CI)       |
| PCV13              | PCV10 <sup>3</sup>             | 9.8 (7.9, 12.0)   | 8.4 (6.7, 12.4)   | 7.7 (5.9, 10.3)   |
|                    | PCV13                          | 25.8 (22.9, 27.6) | 24.1 (22.5, 26.7) | 25.2 (23.4, 28.6) |
|                    | PCV15                          | 31.6 (29.7, 33.2) | 31.6 (28.6, 33.7) | 33.0 (31.8, 34.9) |
|                    | PCV20                          | 57.1 (51.1, 60.5) | 56.9 (53.8, 64.0) | 56.4 (53.9, 60.1) |
|                    | PCV24                          | 63.3 (57.8, 67.1) | 63.7 (60.0, 70.5) | 64.9 (62.5, 68.6) |
|                    | PPV23                          | 62.7 (57.2, 66.5) | 63.4 (58.2, 69.0) | 64.7 (62.2, 68.4) |
| PCV10              | PCV10 <sup>3</sup>             | 14.9(11.7, 19.2)  | 12.7 (7.7, 17.2)  | 15.0 (7.5, 25.7)  |
|                    | PCV13                          | 37.9(31.4, 44.1)  | 38.5 (31.9, 44.2) | 44.7 (38.0, 52.0) |
|                    | PCV15                          | 39.9 (34.8, 44.2) | 41.1 (37.9, 47.6) | 45.0 (42.7, 50.2) |
|                    | PCV20                          | 59.6 (41.6, 65.7) | 61.2 (51.2, 67.2) | 61.2 (56.7, 66.3) |
|                    | PCV24                          | 64.3(53.4, 71.2)  | 65.4 (52.7, 72.8) | 67.1 (60.8, 76.5) |
|                    | PPV23                          | 62.9 (50.4, 69.6) | 63.8 (50.6, 72.2) | 65.0 (57.9, 75.7) |

<sup>1</sup>The model includes all sites regardless of PCV product in use and uses a covariate for product to produce PCV-stratified results. Separate models were run by age group. The modeled output accounts for heterogeneity between the sites and uncertainty from low case counts (conveyed by width of confidence intervals). Results for PCV10-using sites should not be interpreted as representative of all PCV10-using sites globally given the limited data. <sup>2</sup>Serotypes included in each product: PCV7 (4, 6B, 9V, 14, 18C, 19F, 23F), PCV10 (PCV7 + 1, 5, 7F), PCV13 (PCV10 + 3, 6A, 19A), PCV15 (PCV13 + 22F, 33F), PCV20 (PCV15 + 8, 10A, 11A, 12F, 15BC), PCV24 (PCV20 + 2, 9N, 17F, 20), PPV23 (PCV24 - 6A). PCV13 is Pfizer's Prevnar13/Prevenar13; PCV10 is GSK's Synflorix.

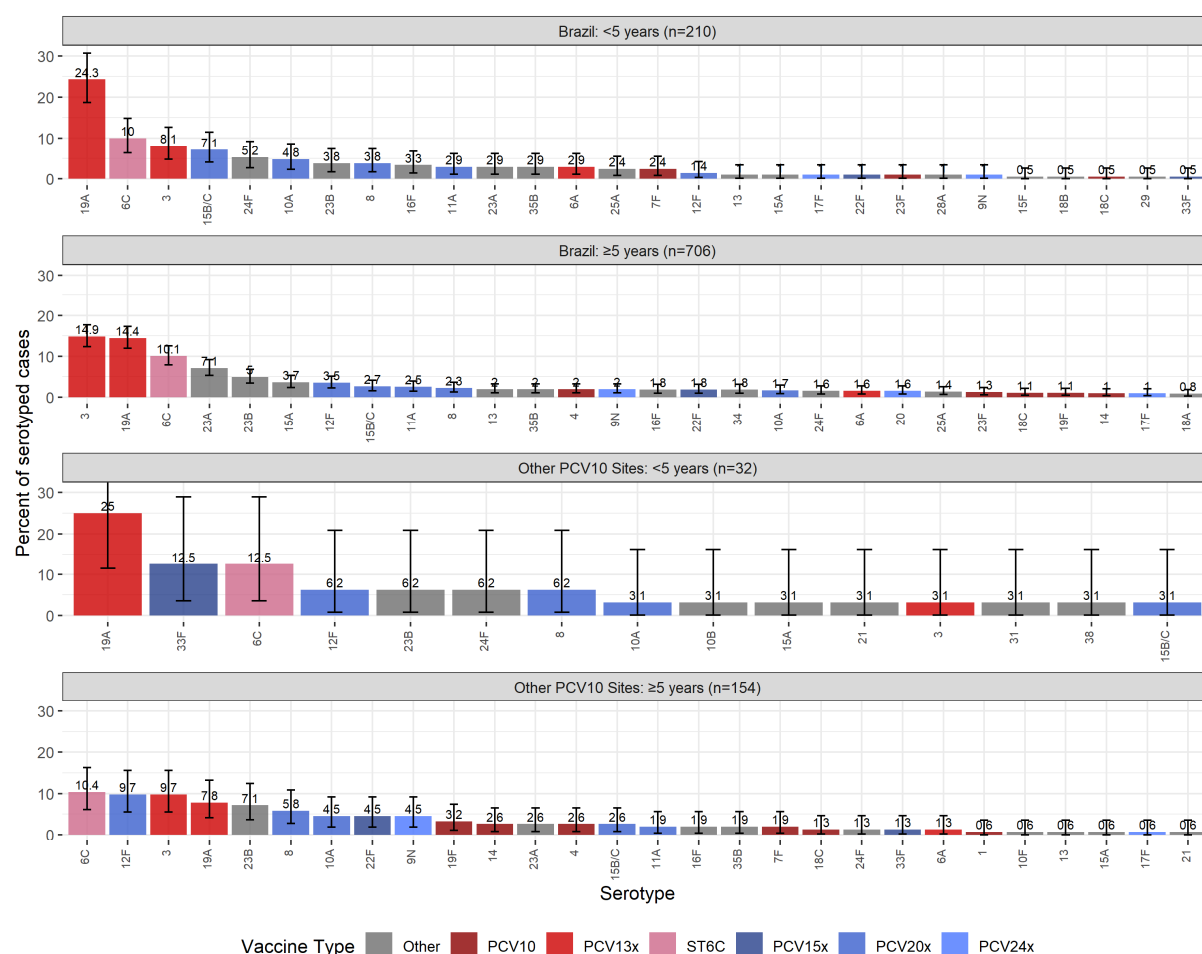

**Figure S4.** Serotype-specific distribution of CSF+ pneumococcal meningitis in the mature PCV10/13 period, comparing Brazil to the other PCV10-using sites<sup>1</sup>. <sup>1</sup>PCV10 sites include those that had the ability to serotype most non-PCV24-type serotypes (Morocco and Bulgaria excluded). Serotypes are colored by the lowest valency PCV product they are included in. Red/pink hues represent PCV10/13 vaccine-types or vaccine-related-types; blue hues represent serotypes covered by PCV products in development; grey represents non-vaccine types. The “x” in the PCV legend represents the additional serotypes included in that product relative to the next lower product (i.e., PCV13x includes serotypes 3, 6A, and 19A). PCV13 is Pfizer’s Prevnar13/Prevenar13; PCV10 is GSK’s Synflorix. Serotype 6C is colored separately because although it is not included in any product it is covered through cross-protection with PCV13-type serotype 6A [1].

## A. Children &lt; 5 years

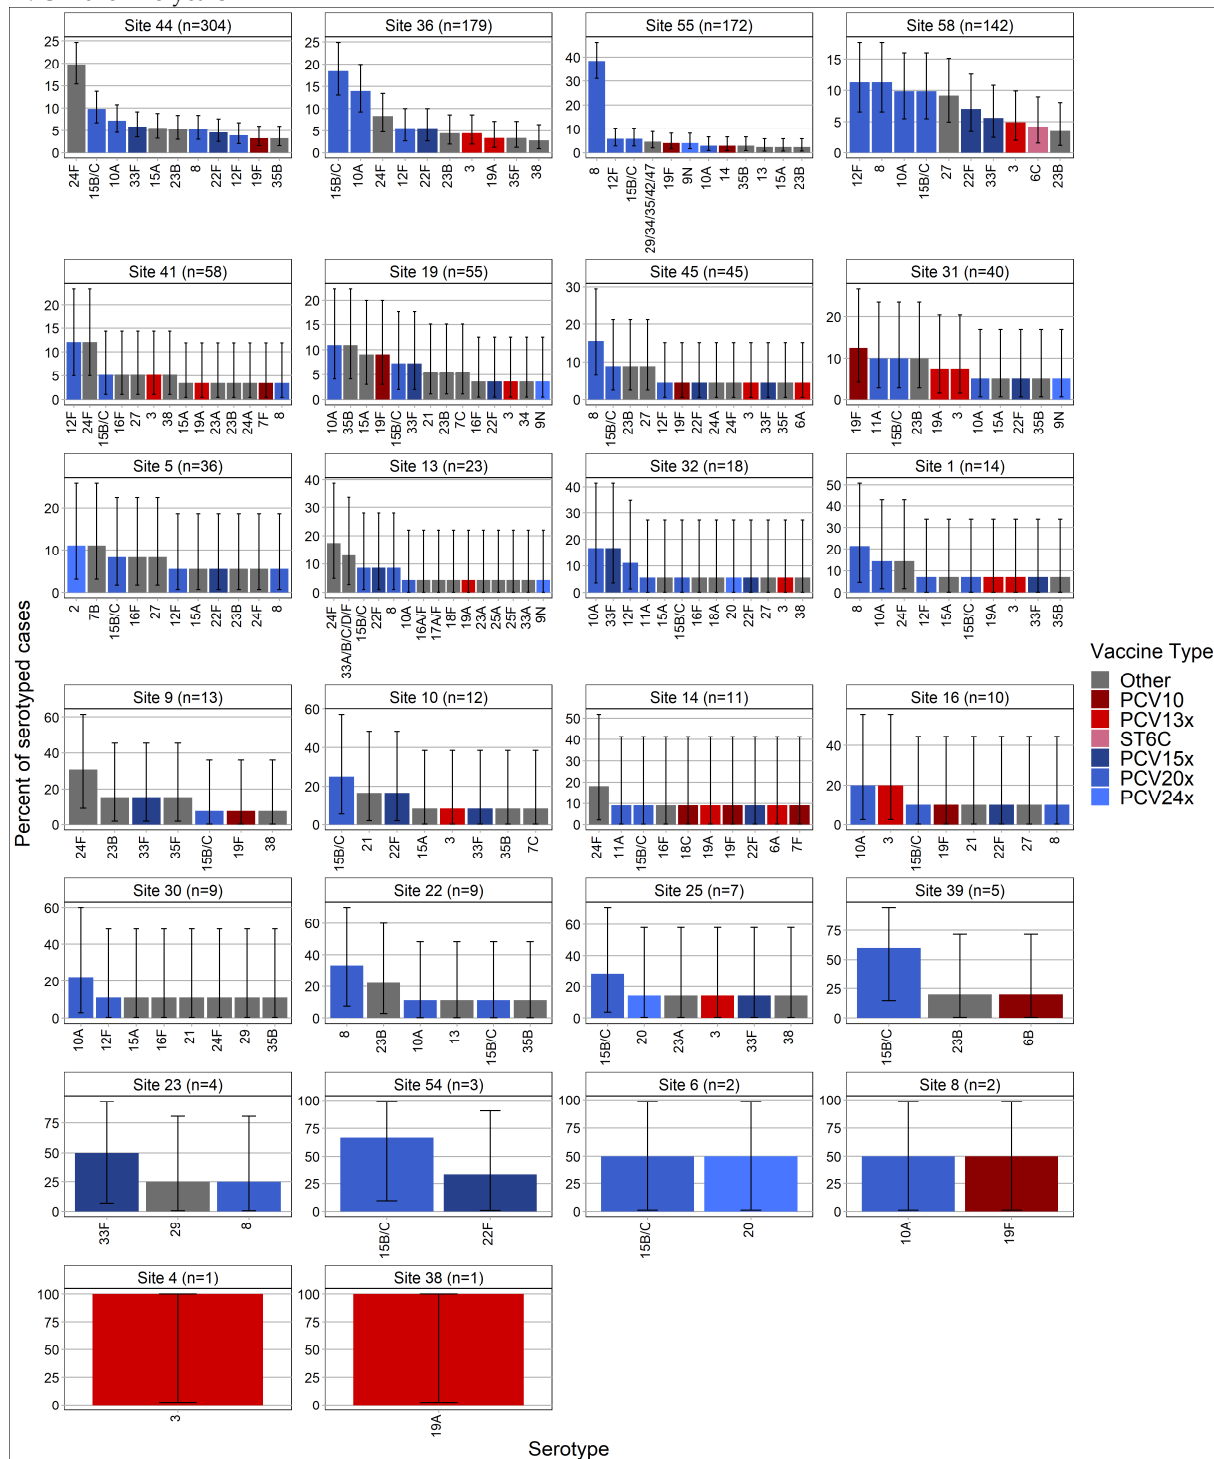

B. Persons  $\geq 5$  years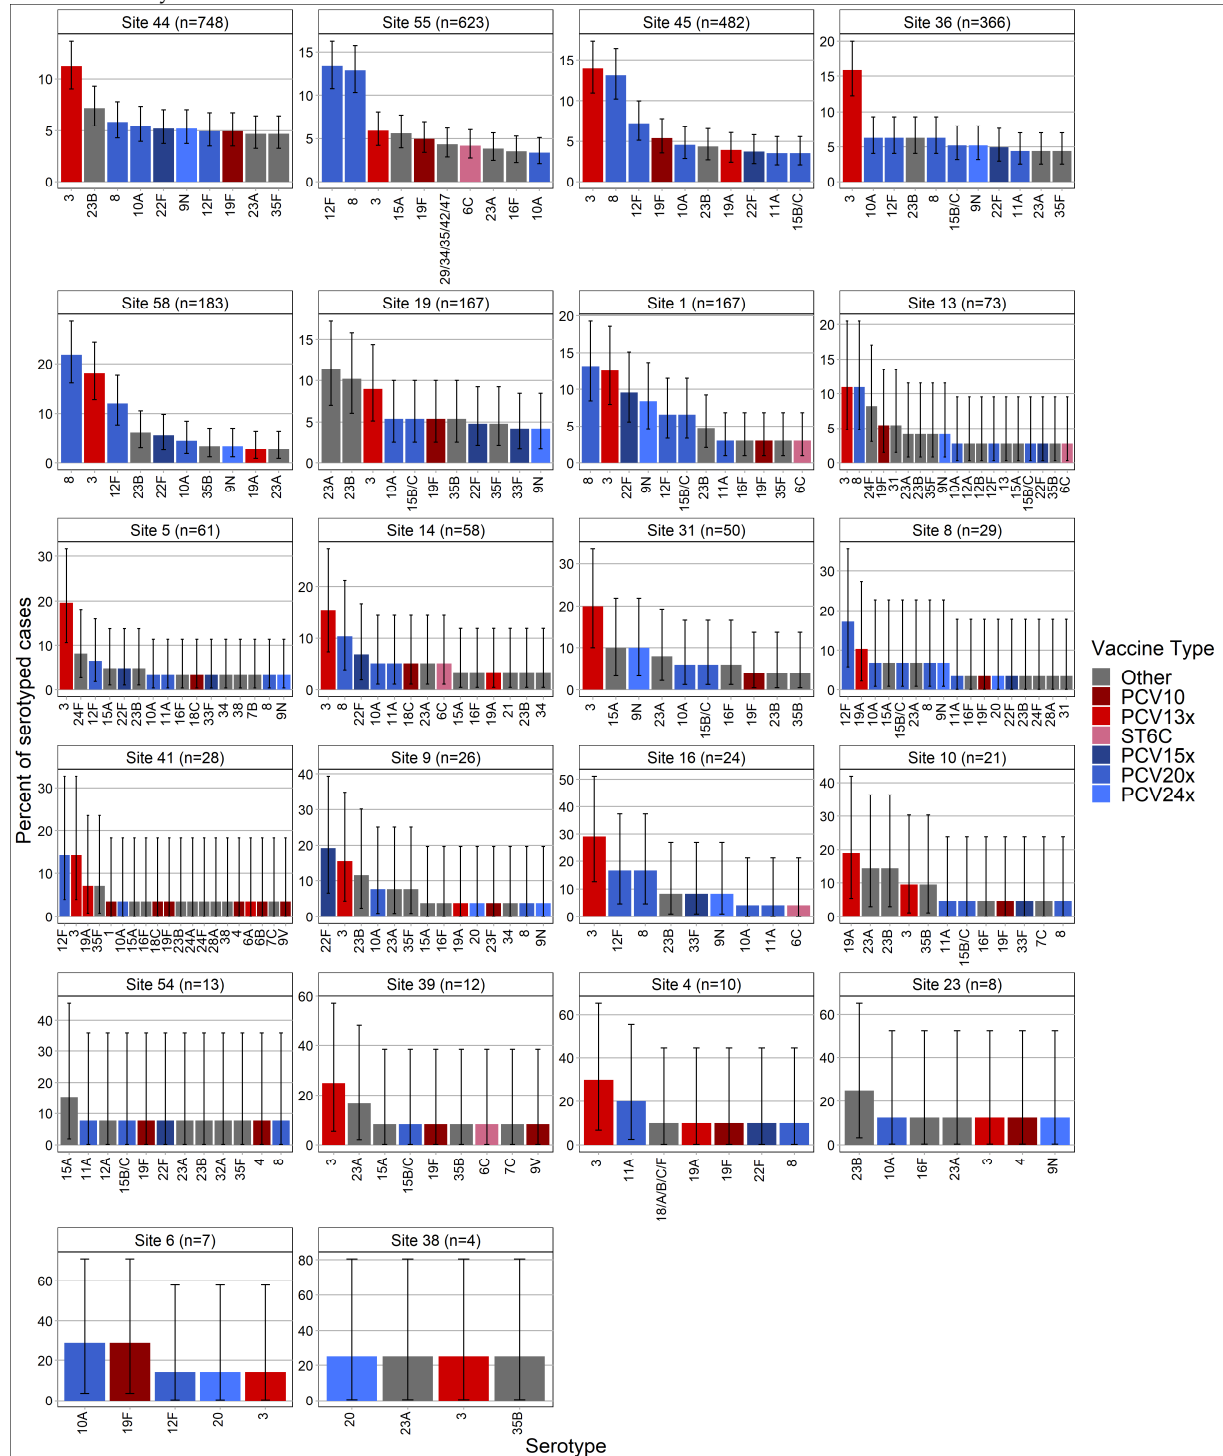

**Figure S5.** Distribution of top 10 ranking serotypes causing CSF+ pneumococcal meningitis in each PCV13-using site<sup>1</sup>.  
<sup>1</sup>Includes sites with the ability to serotype most non-PCV24-type serotypes. Sites are ordered by decreasing number of cases. If multiple serotypes shared rank 10, these were all shown. PCV13 is Pfizer's Prevnar13/Prevenar13; PCV10 is GSK's Synflorix.

**Table S4.** Characteristics of sites contributing pneumococcal meningitis cases to analyses.

| PCV Product <sup>1</sup> | Region                         | Site                            | Meningitis definition for cases that did not have pneumococcus detected in CSF <sup>2</sup> | Analytic year of PCV10/13 introduction <sup>3</sup> | Number of mature years in analysis |           | Serotyping methods <sup>4</sup> |
|--------------------------|--------------------------------|---------------------------------|---------------------------------------------------------------------------------------------|-----------------------------------------------------|------------------------------------|-----------|---------------------------------|
|                          |                                |                                 |                                                                                             |                                                     | < 5 years                          | ≥ 5 years |                                 |
| PCV10                    | Europe                         | Bulgaria                        | <i>Only CSF+ cases reported</i>                                                             | 2010                                                | 2                                  | 3         | Q, L, PCR37                     |
|                          |                                | Finland                         | Spn in blood & diagnosis from ICD-10 codes                                                  | 2010                                                | 2                                  | 2         | WGS                             |
|                          |                                | Iceland                         | Spn in blood & abnormal CSF                                                                 | 2011                                                | 2                                  | 2         | L, PCR                          |
|                          |                                | Latvia                          | <i>Only CSF+ cases reported</i>                                                             | 2012                                                | 1                                  | 1         | Q, L, CST                       |
|                          |                                | Netherlands                     | <i>Only CSF+ cases reported</i>                                                             | 2011                                                | 4                                  | 2         | Q, L                            |
|                          | Latin America                  | Brazil                          | Spn in blood & (abnormal CSF or diagnosis from ICD-10 codes)                                | 2010                                                | 4                                  | 3         | Q, L, PCR70                     |
|                          |                                | Non-Metropolitan Regions, Chile | Spn in blood & clinical diagnosis                                                           | 2011                                                | 1                                  | 1         | Q                               |
|                          | Northern Africa & Western Asia | Casablanca, Morocco             | Spn in blood & abnormal CSF                                                                 | 2012                                                | 1                                  | 1         | Q, L, PCR70                     |
| PCV13                    | Europe                         | Belgium                         | Spn in blood & clinical diagnosis (not from ICD-10 codes)                                   | 2011                                                | 1                                  | 0         | Q                               |
|                          |                                | Denmark                         | <i>Only CSF+ cases reported</i>                                                             | 2010                                                | 3                                  | 3         | Q, L, PCR70                     |
|                          |                                | France                          | Spn in blood & abnormal CSF                                                                 | 2010                                                | 5                                  | 3         | Q, L, PCR70                     |
|                          |                                | Germany                         | Spn in blood & clinical diagnosis                                                           | 2009                                                | 5                                  | 3         | Q, PCR70                        |
|                          |                                | Ireland                         | Spn in blood & (abnormal CSF or clinical diagnosis (not from ICD-10 codes))                 | 2010                                                | 2                                  | 2         | Q, L, PCR                       |
|                          |                                | Italy                           | Spn in blood & clinical diagnosis (not from ICD-10 codes)                                   | 2010                                                | 5                                  | 3         | Q, L                            |
|                          |                                | Norway                          | Spn in blood & clinical diagnosis (not from ICD-10 codes)                                   | 2011                                                | 3                                  | 1         | Q, NGS                          |
|                          |                                | Catalonia, Spain                | Spn in blood & abnormal CSF                                                                 | 2010                                                | 1                                  | 1         | Q, PCR37                        |
|                          |                                | Madrid, Spain                   | Spn in blood & abnormal CSF                                                                 | 2010                                                | 5                                  | 3         | Q, L, PCR76                     |
|                          |                                | Navarra, Spain                  | Spn in blood & abnormal CSF                                                                 | 2010                                                | 2                                  | 2         | Q, PCR76                        |
|                          |                                | Switzerland                     | Spn in blood & (abnormal CSF or clinical diagnosis (not from ICD-10 codes))                 | 2011                                                | 3                                  | 1         | Q                               |
|                          |                                | England, UK                     | Spn in blood & clinical diagnosis                                                           | 2010                                                | 6                                  | 4         | Q, L                            |
|                          |                                | Scotland, UK                    | Spn in blood & clinical diagnosis (not from ICD-10 codes)                                   | 2010                                                | 5                                  | 3         | L                               |

|                                |                                    |                                                                    |      |   |   |                 |
|--------------------------------|------------------------------------|--------------------------------------------------------------------|------|---|---|-----------------|
| North America                  | Alberta, Canada                    | Spn in blood & abnormal CSF                                        | 2010 | 4 | 2 | Q               |
|                                | Ontario, Canada                    | Spn in blood & (abnormal CSF or diagnosis (not from ICD-10 codes)) | 2011 | 3 | 2 | Q               |
|                                | Quebec (excluding Nunavik), Canada | Spn in blood & clinical diagnosis                                  | 2011 | 3 | 1 | Q               |
|                                | ABCs, USA                          | Spn in blood & clinical diagnosis (not from ICD-10 codes)          | 2010 | 4 | 2 | Q, PCR70, WGS   |
|                                | Alaska, USA                        | Spn in blood & clinical diagnosis                                  | 2010 | 4 | 2 | Q, L, PCR70     |
|                                | Massachusetts, USA                 | <i>Only CSF+ cases reported</i>                                    | 2010 | 4 | 2 | Q               |
|                                | Southwest, USA (Indigenous)        | Spn in blood & clinical diagnosis                                  | 2010 | 5 | 3 | Q               |
|                                | Utah                               | Spn in blood & abnormal CSF                                        | 2010 | 4 | 0 | Q               |
| Latin America                  | Argentina                          | Spn in blood & abnormal CSF or clinical diagnosis                  | 2012 | 2 | 1 | Q, PCR37, PCR70 |
|                                | Costa Rica                         | Spn in blood & clinical diagnosis                                  | 2011 | 2 | 2 | Q               |
| Sub-Saharan Africa             | Benin (WHO IB-VPD)                 | <i>Only CSF+ cases reported</i>                                    | 2011 | 1 | 0 | PCR             |
|                                | Blantyre District, Malawi          | <i>Only CSF+ cases reported</i>                                    | 2012 | 1 | 1 | L, PCR37        |
|                                | Cameroon (WHO IB-VPD)              | <i>Only CSF+ cases reported</i>                                    | 2011 | 1 | 0 | PCR             |
|                                | South Africa                       | Spn in blood & clinical diagnosis                                  | 2011 | 3 | 2 | Q, PCR38        |
| Northern Africa & Western Asia | Israel                             | Spn in blood & abnormal CSF                                        | 2010 | 2 | 2 | Q               |
| Asia                           | Hong Kong                          | Spn in blood & (abnormal CSF or diagnosis (not from ICD-10 codes)) | 2011 | 4 | 2 | PCR35           |
|                                | Japan                              | Spn in blood & clinical diagnosis (not from ICD-10 codes)          | 2014 | 1 | 0 | Q, PCR70        |
|                                | Singapore                          | <i>Only CSF+ cases reported</i>                                    | 2012 | 2 | 2 | Q               |
| Oceania                        | Australia (Non-Indigenous)         | Spn in blood & abnormal CSF                                        | 2011 | 3 | 1 | Q, PCR          |

<sup>1</sup>PCV product that was used in the analysis (which met the mature definition for PCV10 or PCV13). Some sites may have used more than one product over time and may currently use a different one from that listed here. PCV13 is Pfizer's Prevnar13/Prevenar13; PCV10 is GSK's Synflorix. <sup>2</sup>All sites defined pneumococcus detected from CSF as pneumococcal meningitis. Listed here are any additional definitions of pneumococcal meningitis. CSF was not systematically collected in all meningitis cases across all sites. The sterile site was assumed to be blood for 8 sites that did not further specify. <sup>3</sup>Year of introduction as included in the analysis (year of introduction + 1 year if introduced in the last quarter of the year). If a site switched between PCV10 and PCV13, the year corresponds to the product with sufficient use to meet mature criteria. <sup>4</sup>Where available, the number following "PCR" indicates the number of serotypes able to be identified by PCR: PCR37 = real-time polymerase chain reaction (21 assays/37 serotypes); serotypes detected vary by regional scheme; PCR70 = conventional multiplex polymerase chain reaction (41

assays/70 serotypes); PCR35 = conventional multiplex polymerase chain reaction (35 serotypes); PCR38 = real-time polymerase chain reaction (serotypes detected by Africa scheme plus serotype 8); Q = Quellung reaction; L = Latex agglutination; WGS = Whole genome sequencing; NGS = Next generation sequencing; CST = Capsular sequence typing.

## Reference

1. Cooper, D.; Yu, X.; Sidhu, M.; Nahm, M.H.; Fernsten, P.; Jansen, K.U. The 13-Valent Pneumococcal Conjugate Vaccine (PCV13) Elicits Cross-Functional Opsonophagocytic Killing Responses in Humans to *Streptococcus Pneumoniae* Serotypes 6C and 7A. *Vaccine* **2011**, *29*, 7207–7211, doi:10.1016/j.vaccine.2011.06.056.
